# Supplementary material for: The Minimum Protein Staple? – Towards ‘bio’-Baldwin's rules via inter-phosphosite linking in the MEK1 activation loop
Source: Royal Society of Chemistry journal article supplement (doi:10.1039/d3sc04631a), 2023-12-01
Supplement: d3sc04631a1.pdf [file d3sc04631a1.pdf]

**The Minimum Protein Staple? – Towards ‘bio’-Baldwin’s Rules via Inter-phosphosite Linking in the MEK1 Activation Loop**

SUPPLEMENTARY DATA

## Supplementary Figures

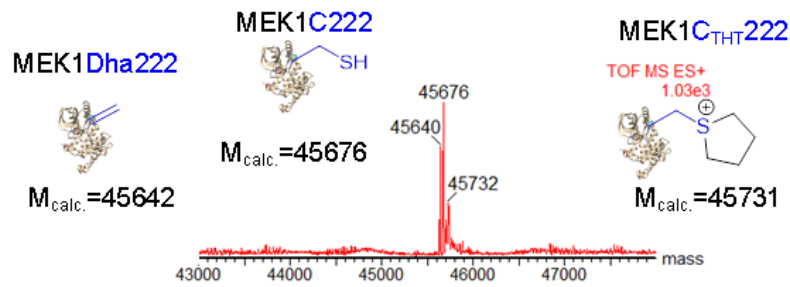

**Supplementary Figure S1. Reaction of Penta-Cys MEK1-Cys222 with DIB in the presence of ADP-Mg after 6h.**

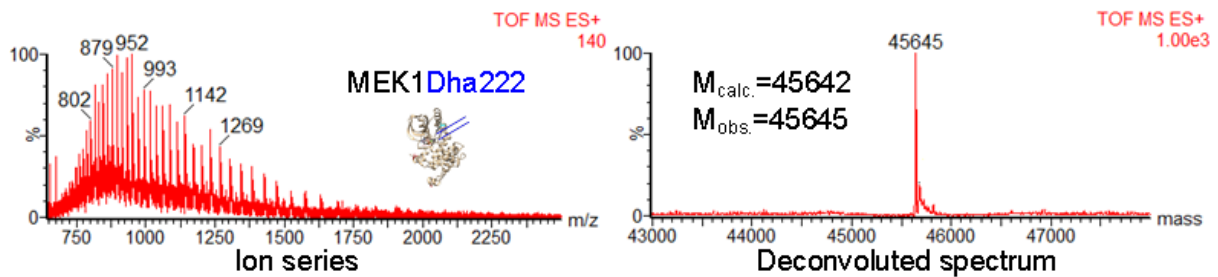

**Supplementary Figure S2. Reaction of Penta-Cys MEK1-Cys222 with DIB in the presence of ADP-Mg after 20h.**

| Peptide | RT/min | m/z (charge)  | ppm  | Modifications                                     | -10lgP | TIC    | Max Intensity |
|---------|--------|---------------|------|---------------------------------------------------|--------|--------|---------------|
| 206-227 | 37.74  | 1225.5529 (2) | -6.7 | C <sub>ET</sub> 222, oxM219, C <sub>CAM</sub> 207 | 98.92  | 1.21E4 | 7.74E2        |

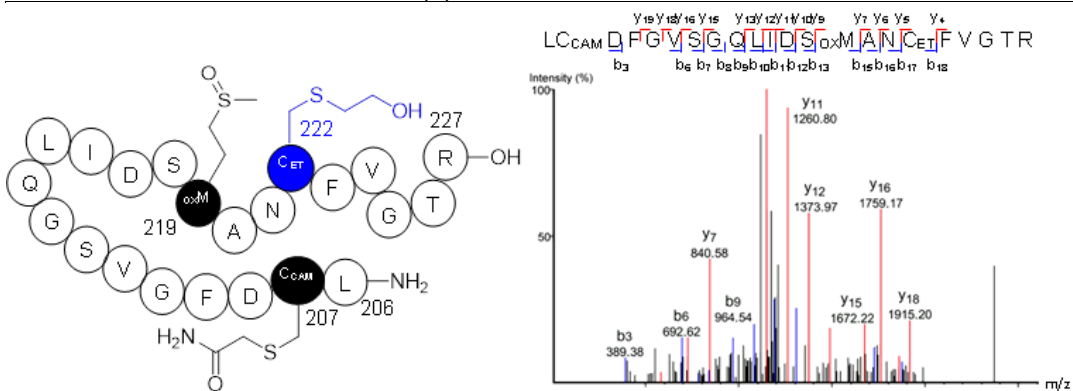

**Supplementary Figure S3. MSMS Analysis of Product of Reaction of Penta-Cys MEK1-Cys222 with DIB in the presence of ADP-Mg.**

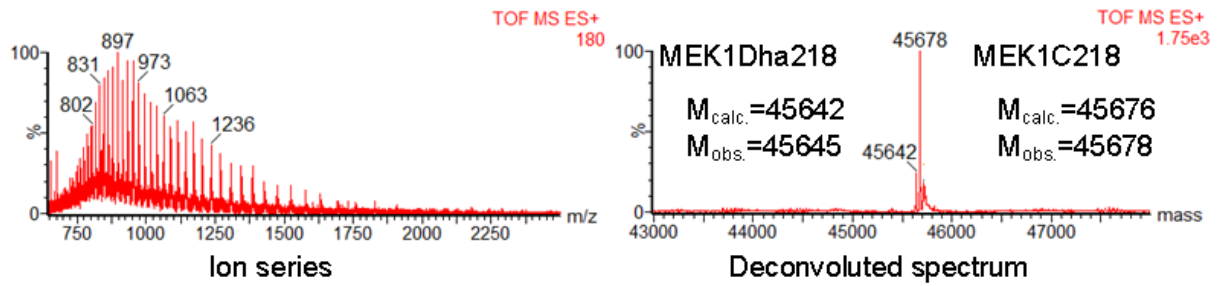

Supplementary Figure S4. Reaction of Penta-Cys MEK1-Cys218 with DIB in the presence of ADP-Mg after 26h.

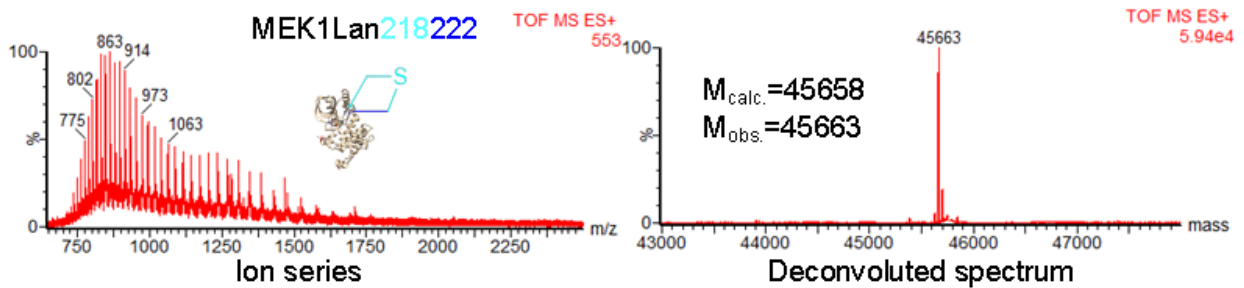

Supplementary Figure S5. Reaction of Hexa-Cys MEK1-Cys218-Cys222 with DIB in the presence of ADP-Mg after 15h.

| Peptide | Mass (Da) | Score | Modifications     | Method   |
|---------|-----------|-------|-------------------|----------|
| 206-227 | 2348.04   | 101   | Lan218222, oxM219 | ITMS CID |

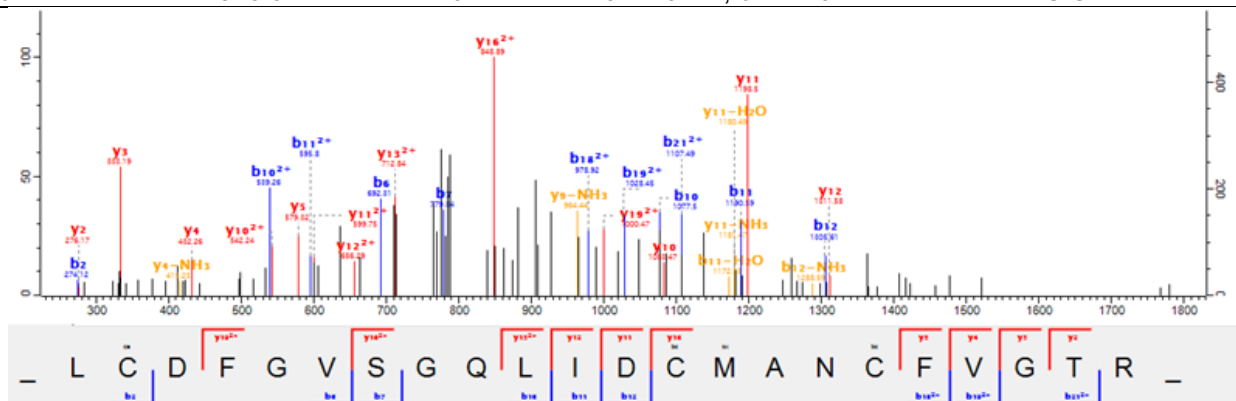

Supplementary Figure S6. MSMS Analysis of Product of Reaction of Hexa-Cys MEK1-Cys218-Cys222 with DIB in the presence of ADP-Mg.

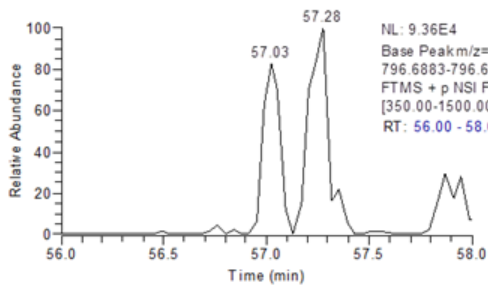

**Chromatogram**

#14788-14930 RT: 56.87-57.32 AV: 13 NL: 4.76E4  
F: FTMS + p NSI Full ms[350.00-1500.00]

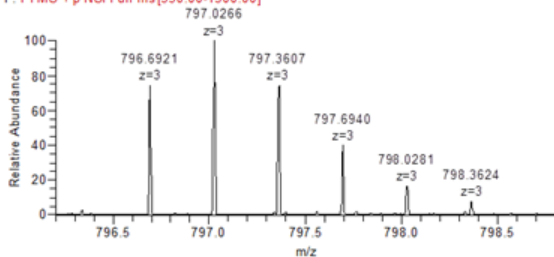

**MS of RT=57.03 min**

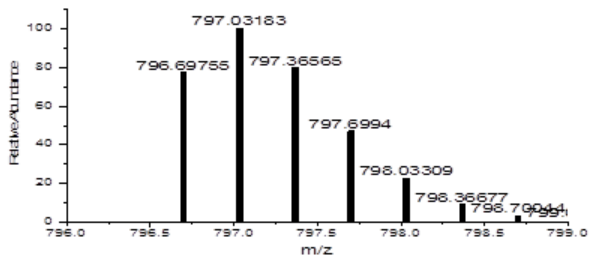

**Calculated MS for desired peptide**

#14872-14926 RT: 57.17-57.32 AV: 5 NL: 6.70E4

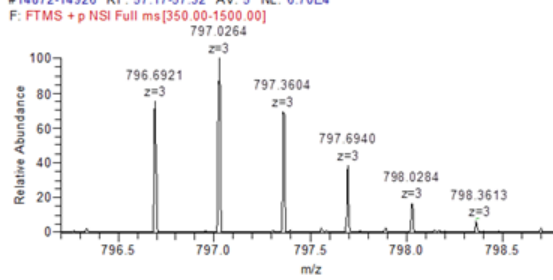

**MS of RT=57.28 min**

**Supplementary Figure S7. LC trace of the LCMS-MS analysis of Reaction of Hexa-Cys MEK1-Cys218-Cys222 with DIB in the presence of ADP-Mg.**
